# Supplementary material
Source: PubMed Central journal article supplement (PMC4227827)
Supplement: jcbn14-39s02.pdf [file jcbn14-39s02.pdf]

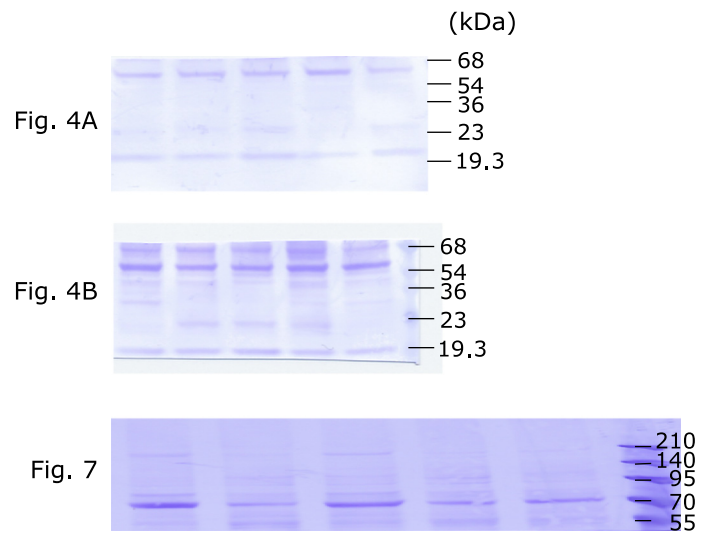

**Supplemental Fig. 2.** Coomassie brilliant blue staining of proteins on the PVDF membranes. This figure shows the same membranes used for immunoblotting in Fig. 4 and Fig. 7 stained with Coomassie brilliant blue.
